# Supplementary material for: A combined experimental-computational investigation on water adsorption in various ZIFs with the SOD and RHO topologies
Source: Royal Society of Chemistry journal article supplement (doi:10.1039/c8ra08460b), 2018-01-01
Supplement: c8ra08460b1.pdf [file c8ra08460b1.pdf]

## Supporting Information

### A Combined Experimental-Computational Investigation of Water

#### Adsorption in Various ZIFs with SOD and RHO Topology

Meizhen Gao, Jing Wang, Zhenghao Rong, Qi Shi\* and Jinxiang Dong

**Section S1:** Details of clusters and partial atomic charges for each ZIF

**Section S2:** DREIDING force field parameters of ZIF atoms

**Section S3:** Lennard-Jones (LJ) parameters of water and CO<sub>2</sub>

**Section S4:** Low and high magnification SEM images of ZIF-90

**Section S5:** Simulation water adsorption heat data

**Section S6:** Simulation CO<sub>2</sub> adsorption isotherms

**Section S7:** Effect of particle size

## Section S1: Details of clusters and partial atomic charges for each ZIF

### ZIF-8

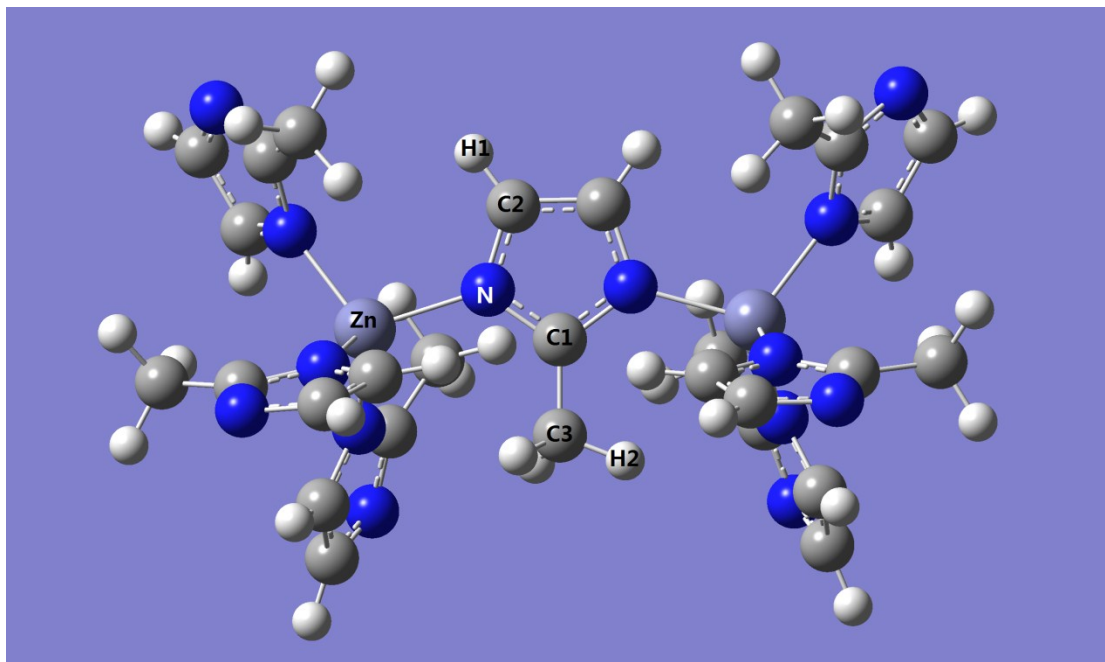

Figure S1. Cluster used for deriving partial charges on ZIF-8 atoms.

Table S1. Partial atomic charges for ZIF-8 atoms.

| Atom      | Zn    | N       | C1    | C2     | C3     | H1     | H2     |
|-----------|-------|---------|-------|--------|--------|--------|--------|
| Charge(e) | 0.884 | -0.3985 | 0.484 | -0.124 | -0.585 | 0.1342 | 0.1452 |

## ZIF-90

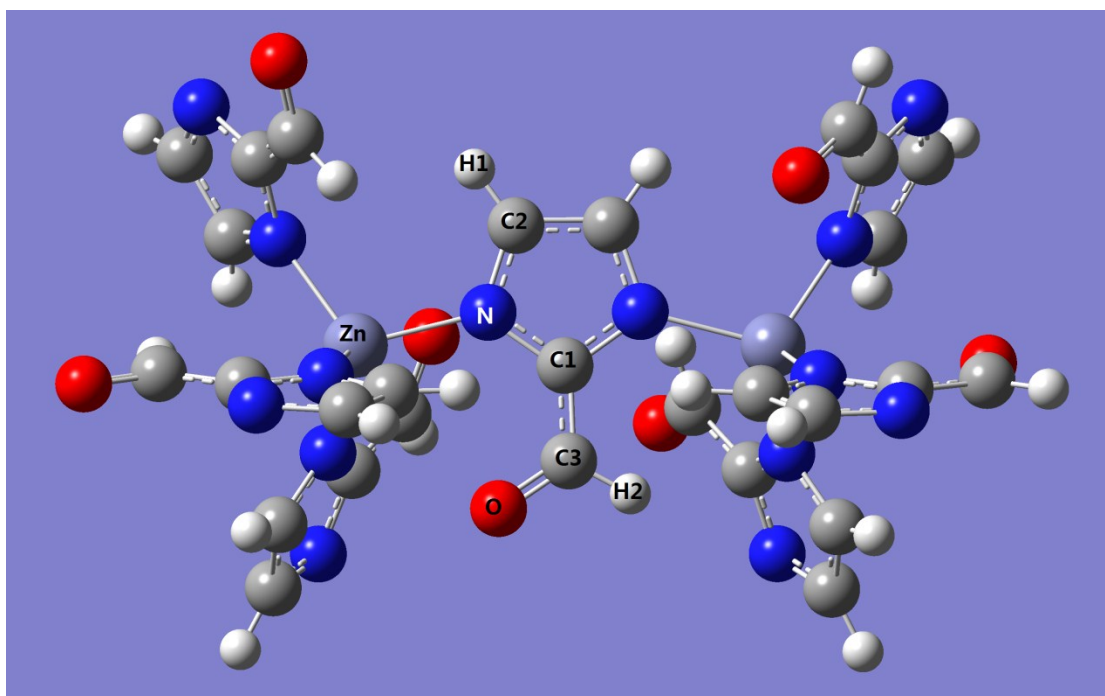

Figure S2. Cluster used for deriving partial charges on ZIF-90 atoms.

Table S2. Partial atomic charges for ZIF-90 atoms.

| Atom      | Zn    | N       | C1    | C2      | C3    | H1    | H2     | O       |
|-----------|-------|---------|-------|---------|-------|-------|--------|---------|
| Charge(e) | 0.762 | -0.3165 | 0.253 | -0.0171 | 0.206 | 0.116 | 0.0408 | -0.4456 |

## SIM-1

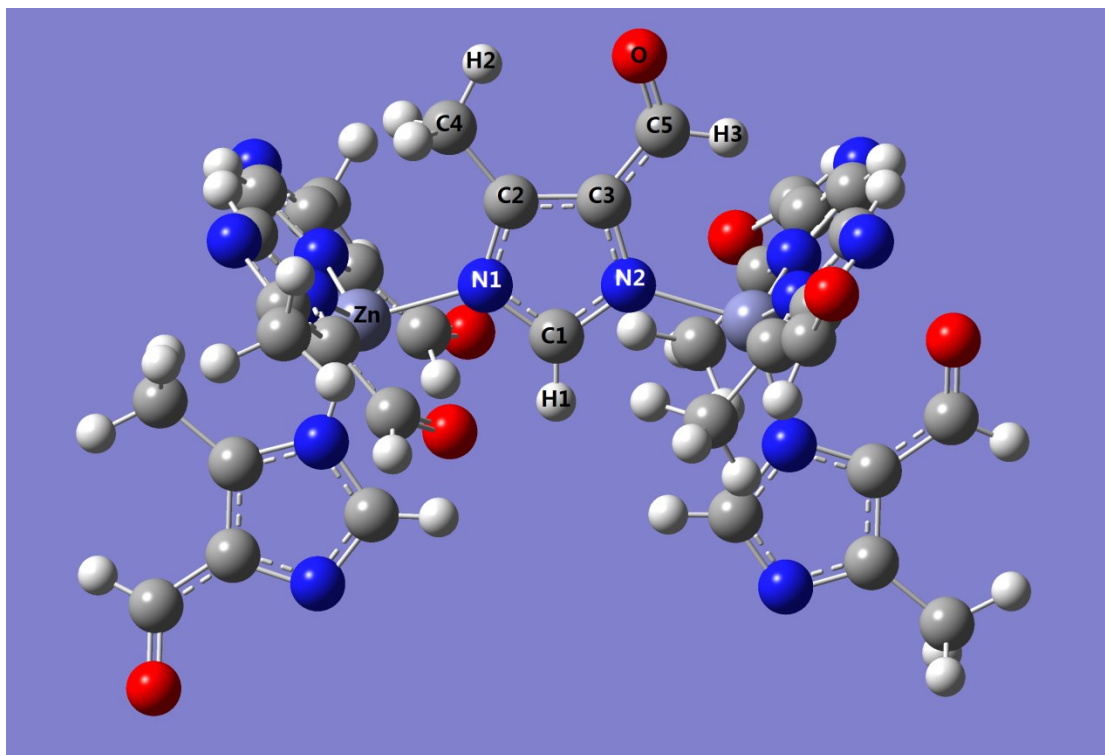

Figure S3. Cluster used for deriving partial charges on SIM-1 atoms.

Table S3. Partial atomic charges for SIM-1 atoms.

| Atom      | Zn     | N1    | N2     | C1    | C2     | C3     |
|-----------|--------|-------|--------|-------|--------|--------|
| Charge(e) | 0.756  | -0.25 | -0.389 | 0.114 | 0.393  | -0.161 |
| Atom      | C4     | C5    | H1     | H2    | H3     | O      |
| Charge(e) | -0.495 | 0.492 | 0.087  | 0.137 | -0.075 | -0.505 |

## MAF-6

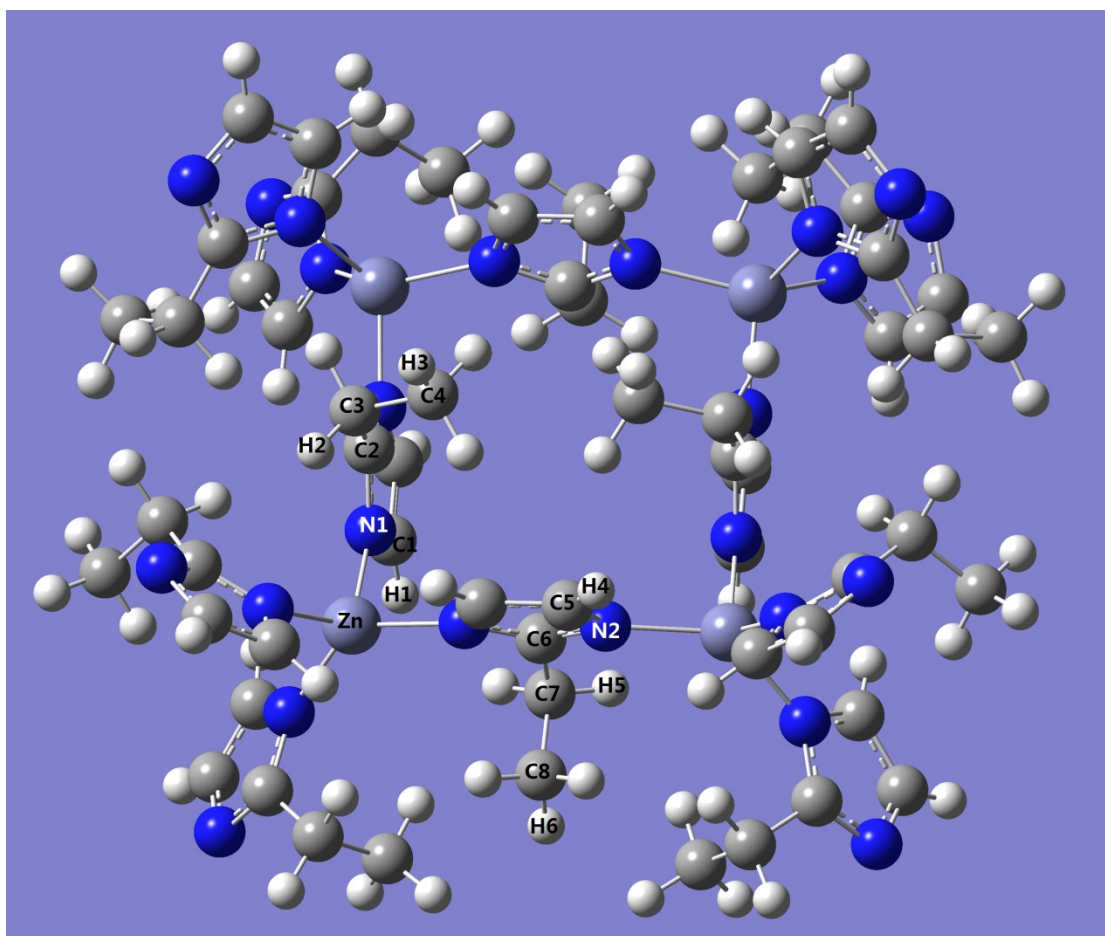

Figure S4. Cluster used for deriving partial charges on MAF-6 atoms.

Table S4. Partial atomic charges for MAF-6 atoms.

| Atom      | Zn      | C1     | C2     | C3     | C4     |
|-----------|---------|--------|--------|--------|--------|
| Charge(e) | 0.757   | -0.124 | 0.018  | -0.049 | -0.12  |
| Atom      | N1      | H1     | H2     | H3     | H3     |
| Charge(e) | -0.187  | 0.101  | 0.0343 | 0.042  | 0.042  |
| Atom      | C5      | C6     | C7     | C8     | C8     |
| Charge(e) | -0.1918 | 0.004  | -0.428 | 0.307  | 0.307  |
| Atom      | N2      | H4     | H5     | H6     | H6     |
| Charge(e) | -0.121  | 0.1345 | 0.1185 | -0.048 | -0.048 |

## ZIF-25

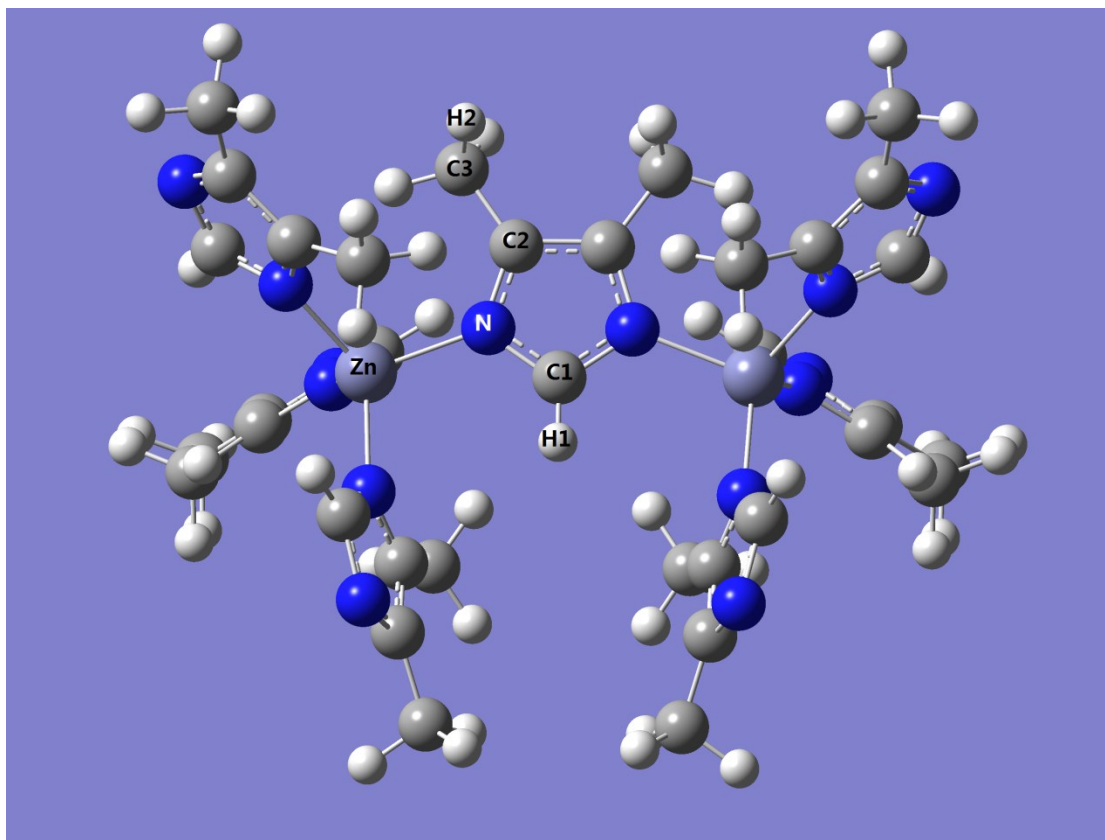

Figure S5. Cluster used for deriving partial charges on ZIF-25 atoms.

Table S5. Partial atomic charges for ZIF-25 atoms.

| Atom      | Zn    | C1     | H1    | N      | C2    | C3     | H2     |
|-----------|-------|--------|-------|--------|-------|--------|--------|
| Charge(e) | 1.006 | -0.154 | 0.128 | -0.371 | 0.166 | -0.197 | 0.0545 |

## ZIF-93

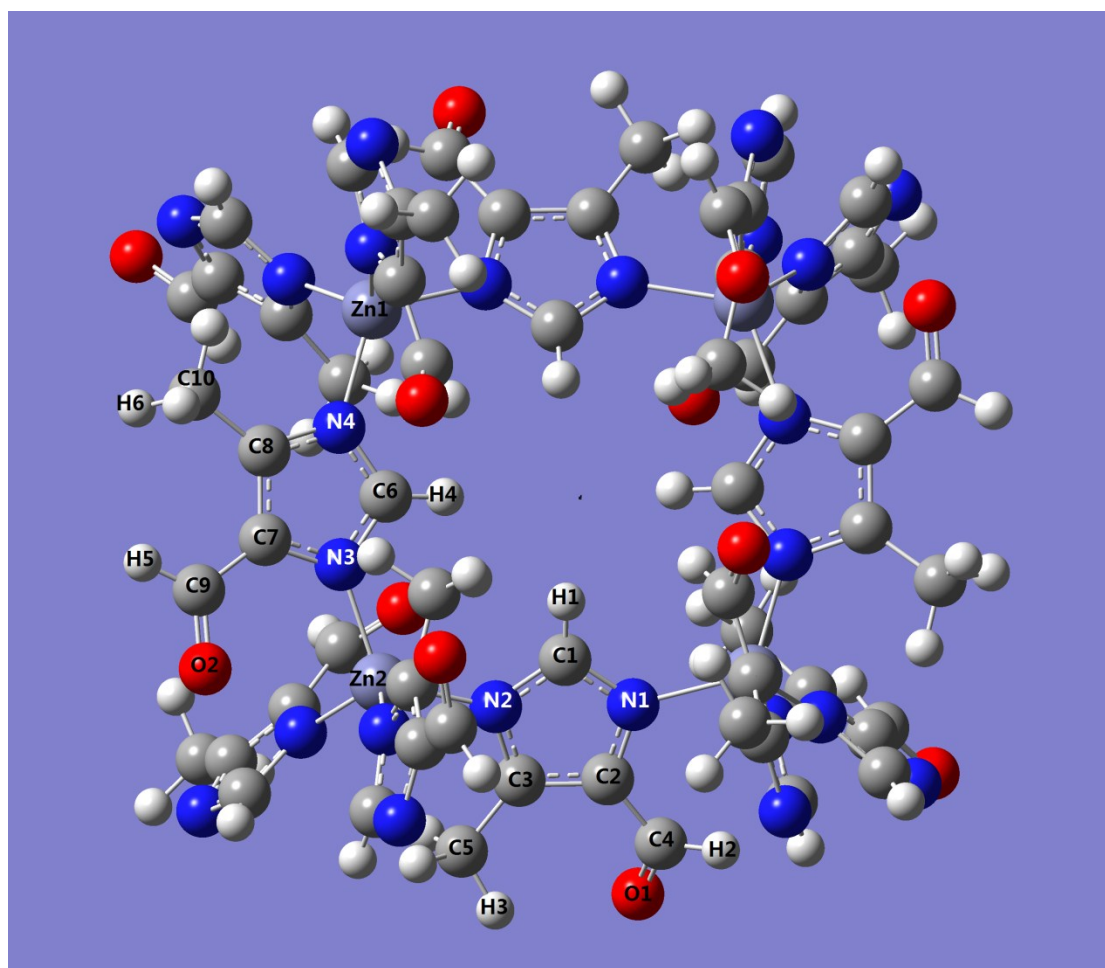

Figure S6. Cluster used for deriving partial charges on ZIF-93 atoms.

Table S6. Partial atomic charges for ZIF-93 atoms.

|                  |            |           |              |           |            |           |
|------------------|------------|-----------|--------------|-----------|------------|-----------|
| <b>Atom</b>      | <b>Zn1</b> | <b>C1</b> | <b>H1</b>    | <b>N1</b> | <b>N2</b>  | <b>C2</b> |
| <b>Charge(e)</b> | 0.806      | -0.1      | <b>0.119</b> | -0.26     | -0.241     | -0.2275   |
| <b>Atom</b>      | <b>C3</b>  | <b>C4</b> | <b>O1</b>    | <b>H2</b> | <b>C5</b>  | <b>H3</b> |
| <b>Charge(e)</b> | 0.326      | 0.55      | -0.532       | -0.052    | -0.432     | 0.1184    |
| <b>Atom</b>      | <b>Zn2</b> | <b>C6</b> | <b>H4</b>    | <b>N3</b> | <b>N4</b>  | <b>C7</b> |
| <b>Charge(e)</b> | 0.78       | -0.083    | 0.15         | -0.0321   | -0.202     | -0.2      |
| <b>Atom</b>      | <b>C8</b>  | <b>C9</b> | <b>O2</b>    | <b>H5</b> | <b>C10</b> | <b>H6</b> |
| <b>Charge(e)</b> | 0.132      | 0.405     | -0.526       | 0.0462    | -0.2       | 0.0704    |

## ZIF-97

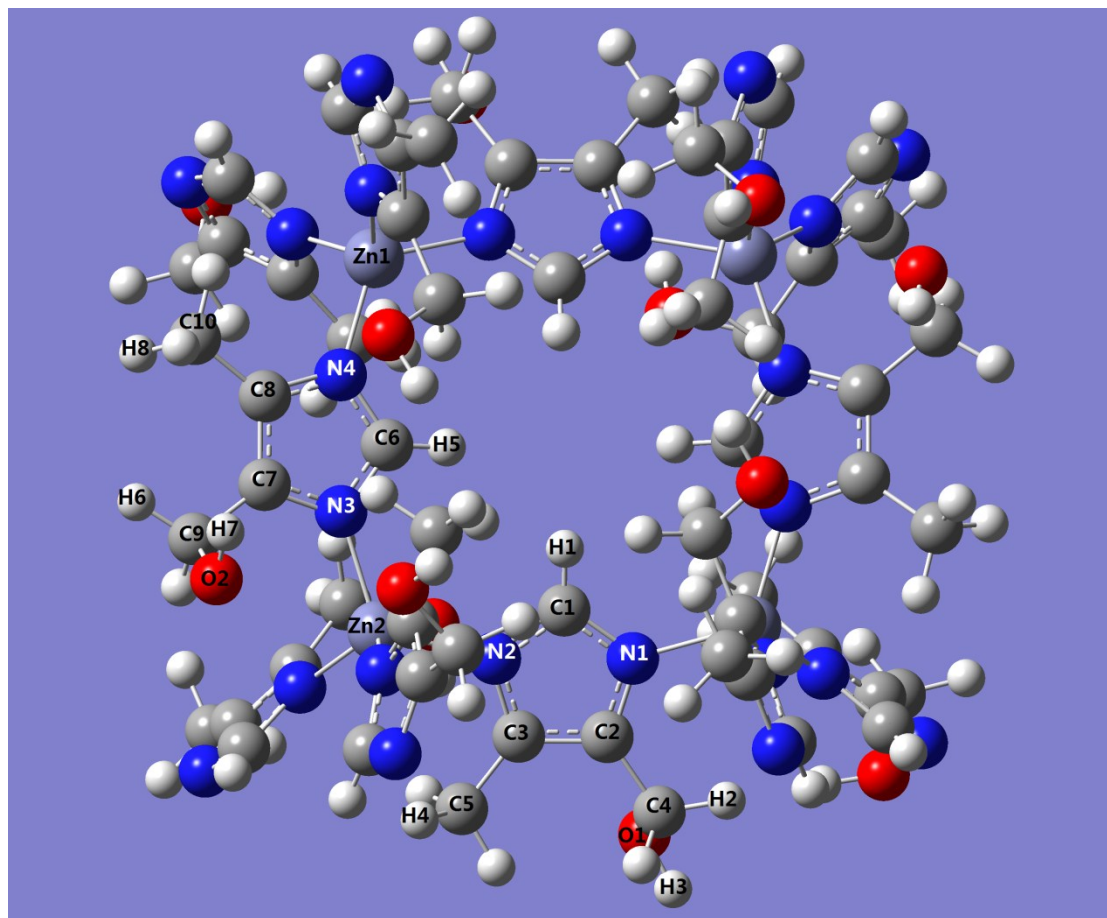

Figure S7. Cluster used for deriving partial charges on ZIF-97 atoms.

Table S7. Partial atomic charges for ZIF-97 atoms.

| Atom      | Zn1   | C1     | H1     | N1     | N2     | C2     | C3    |
|-----------|-------|--------|--------|--------|--------|--------|-------|
| Charge(e) | 0.828 | -0.066 | 0.123  | -0.31  | -0.353 | -0.174 | 0.355 |
| Atom      | C4    | H2     | O1     | H3     | C5     | H4     |       |
| Charge(e) | 0.548 | -0.091 | -0.68  | 0.355  | -0.44  | 0.102  |       |
| Atom      | Zn2   | C6     | H5     | N3     | N4     | C7     | C8    |
| Charge(e) | 0.932 | -0.022 | 0.11   | -0.187 | -0.25  | -0.137 | 0.112 |
| Atom      | C9    | H6     | O2     | H7     | C10    | H8     |       |
| Charge(e) | 0.24  | 0.017  | -0.615 | 0.35   | -0.156 | 0.053  |       |



## Section S2: DREIDING force field parameters of ZIF atoms

Table S8. DREIDING parameters of ZIF atoms.

| Atom | $\sigma$ (Å) | $\varepsilon/k_B$ (K) |
|------|--------------|-----------------------|
| Zn   | 4.045        | 27.676                |
| C    | 3.473        | 47.854                |
| N    | 3.263        | 38.948                |
| O    | 3.033        | 48.156                |
| H    | 2.846        | 7.649                 |

## Section S3: Lennard-Jones (LJ) parameters of water and CO<sub>2</sub>

Table S9. TIP3P parameters of water and EPM2 parameters of CO<sub>2</sub>.

|                  | LJ parameters and charges |              |                       |           | bond stretching    | bond bending                                     | Ref. |
|------------------|---------------------------|--------------|-----------------------|-----------|--------------------|--------------------------------------------------|------|
|                  | site                      | $\sigma$ (Å) | $\varepsilon/k_B$ (K) | charge(e) |                    |                                                  |      |
| H <sub>2</sub> O | O                         | 3.151        | 76.42                 | -0.834    | $r_{O-H}=0.9572$ Å | $\theta^{\circ}_{\angle H-O-H} = 104.52^{\circ}$ | 1    |
|                  | H                         | 0            | 0                     | 0.417     |                    |                                                  |      |
| CO <sub>2</sub>  | C                         | 2.76         | 28.13                 | 0.6512    | $r_{O-H}=1.149$ Å  | $\theta^{\circ}_{\angle O-C-O} = 180^{\circ}$    | 2    |
|                  | O                         | 3.03         | 80.51                 | -0.3256   |                    |                                                  |      |

## Section S4: Low and high magnification SEM images of ZIF-90

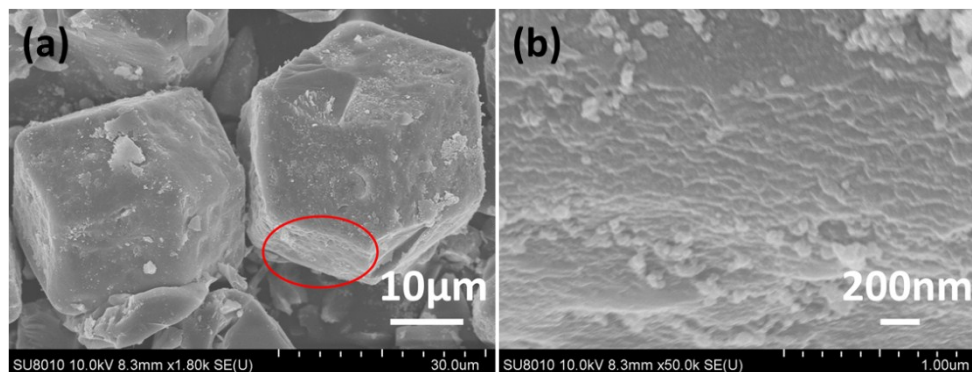

Figure S8. Low (a) and high (b) magnification SEM images of ZIF-90.

## Section S5: Simulation water adsorption heat data

Table S10. The specific values of simulated water adsorption heat of ZIFs at infinite dilution.

| ZIFs           | ZIF-8 | ZIF-90 | SIM-1 | MAF-6 | ZIF-25 | ZIF-93 | ZIF-97 |
|----------------|-------|--------|-------|-------|--------|--------|--------|
| $Q^a$ (kJ/mol) | 10.73 | 31.35  | 60.25 | 9.91  | 17.24  | 52.18  | 46.05  |
| $Q^b$ (kJ/mol) | 13.60 | 41.70  | —     | —     | —      | 55.29  | 50.14  |

<sup>a</sup>Simulated water adsorption heat of this work. <sup>b</sup>Simulated water adsorption heat of ref. 3

## Section S6: Simulation CO<sub>2</sub> adsorption isotherms

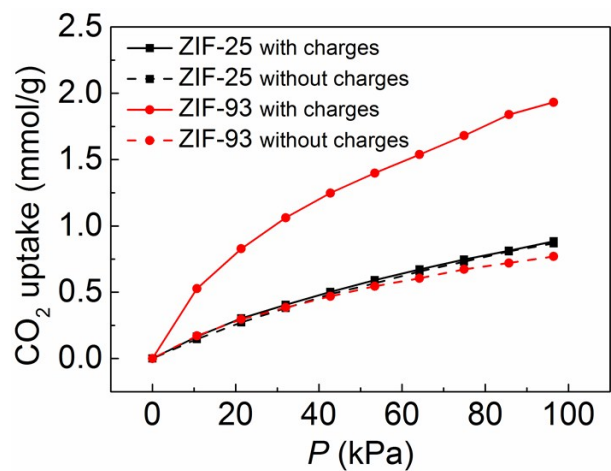

Figure S9. Simulated the CO<sub>2</sub> adsorption isotherms at 298K of ZIF-25 and ZIF-93.

## Section S7: Effect of particle size

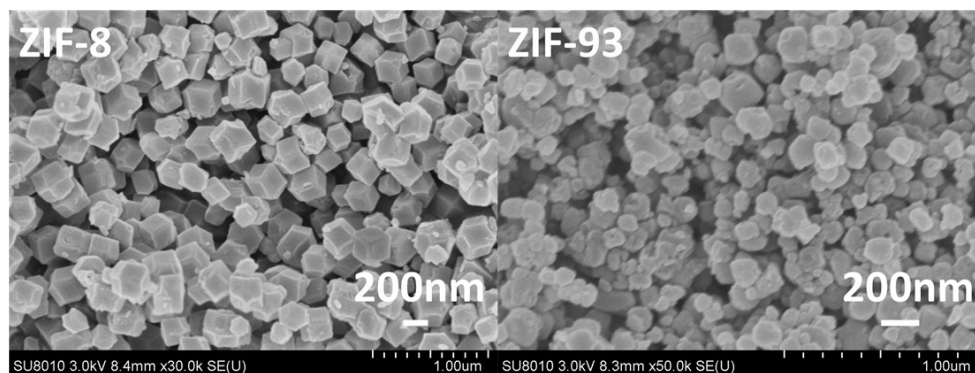

Figure S10. SEM images of ZIF-8 (0.2  $\mu\text{m}$ ) and ZIF-93 (0.1  $\mu\text{m}$ ).

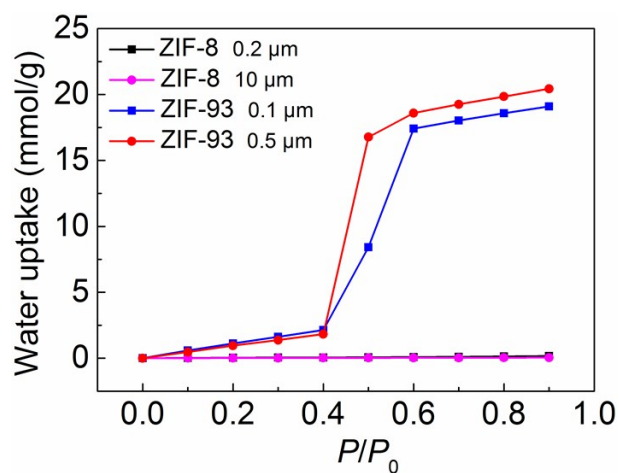

Figure S11. Experimental water adsorption isotherms at 298 K of ZIF-8 (0.2  $\mu\text{m}$ ), ZIF-8 (10  $\mu\text{m}$ ), ZIF-93 (0.1  $\mu\text{m}$ ), and ZIF-93 (0.5  $\mu\text{m}$ ).

## References

- 1 P. Mark and L. Nilsson, *Journal of Physical Chemistry A*, 2001, **105**, 9954-9960.
- 2 J. G. Harris and K. H. Yung, *Journal of Physical Chemistry*, 1995, **99**, 12021-12024.
- 3 H. Amrouche, B. Creton, F. Siperstein and C. Nieto-Draghi, *RSC Advances*, 2012, **2**, 6028.
